# Supplementary material for: Soil nitrogen and water management by winter-killed catch crops
Source: Copernicus journal article supplement (doi:10.5194/soil-2021-124), 2021-11-16
Supplement: Supplementary file 1 [file soil-2021-124-supplement.pdf]

# Supplement of

## Nitrogen management by winter-killed catch crop mixtures

N. Gentsch et al.

5 Correspondence to: Norman Gentsch (gentsch@ifbk.uni-hannover.de)

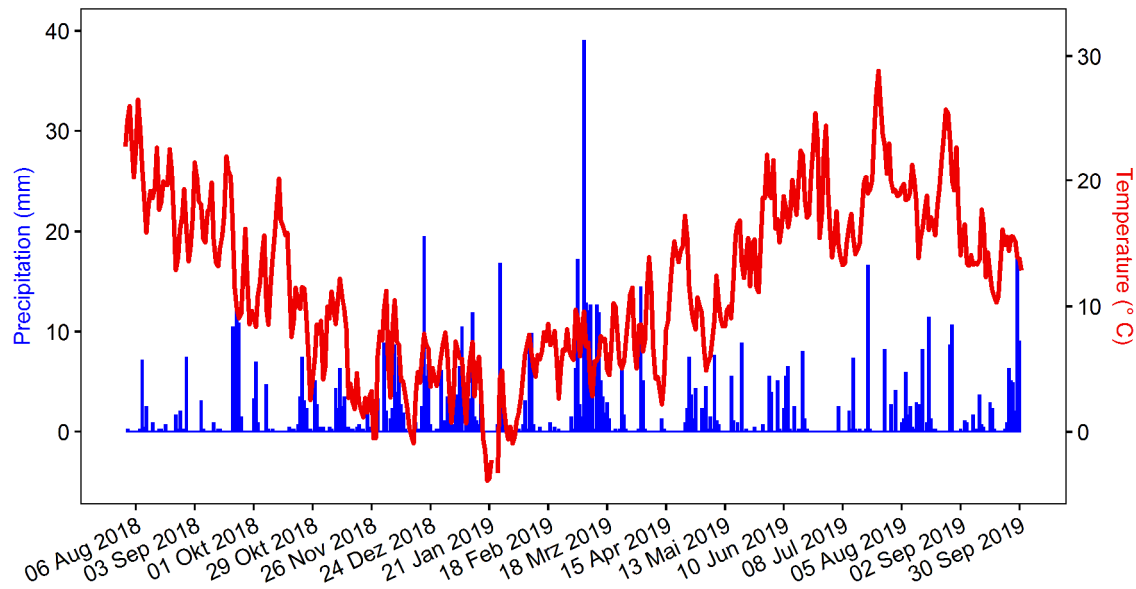

**Figure S1:** Temperature and precipitation during the soil monitoring period 2018/19. Date were recorded from a small weather station at the Asendorf field station.

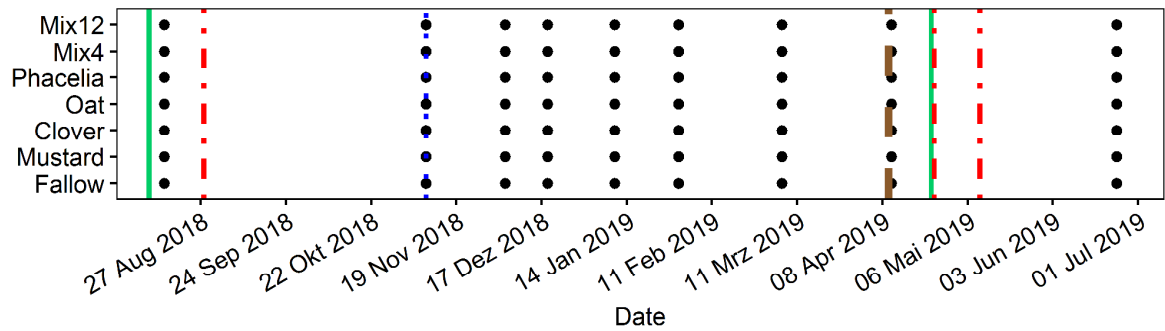

10 **Figure S2:** Timeline and treatments of the study. Black dots: soil sampling campaigns; green solid lines: seeding of catch crops and maize; blue dotted line: termination of catch crops; red dash dot lines; N fertilization according to Table S2; brown dashed line: seed bed preparation.

Table S1: Seeding density and proportion of seed in the field experiments.

| Treatment | Catch crop  | Plant common names | Plant scientific names               | Cultivar   | Proportion of seeds (% weight) | Proportion of seeds (% of seeds) | Seeding density (seeds m <sup>-2</sup> ) | Seeding ammount (kg ha <sup>-1</sup> ) |
|-----------|-------------|--------------------|--------------------------------------|------------|--------------------------------|----------------------------------|------------------------------------------|----------------------------------------|
| 1         | Bare fallow |                    |                                      |            |                                |                                  |                                          |                                        |
| 2         | Mustard     | White mustard      | <i>Sinapis alba L.</i>               | Litember   | 100.0                          | 100.0                            | 300.0                                    | 18.0                                   |
| 3         | Clover      | Egyptian clover    | <i>Trifolium alexandrinum L.</i>     | Alex       | 100.0                          | 100.0                            | 833.3                                    | 25.0                                   |
| 4         | Oat         | Bristle oat        | <i>Avena strigosa Schreb.</i>        | Panache    | 100.0                          | 100.0                            | 588.2                                    | 100.0                                  |
| 5         | Phacelia    | Phacelia           | <i>Phacelia tanacetifolia Benth.</i> | Beehappy   | 100.0                          | 100.0                            | 705.9                                    | 12.0                                   |
| 6         | Mix4        | White mustard      | <i>Sinapis alba L.</i>               | Litember   | 16.0                           | 10.3                             | 66.7                                     |                                        |
|           |             | Phacelia           | <i>Phacelia tanacetifolia Benth.</i> | Beehappy   | 20.0                           | 45.5                             | 294.1                                    |                                        |
|           |             | Egyptian clover    | <i>Trifolium alexandrinum L.</i>     | Alex       | 28.0                           | 36.1                             | 233.3                                    |                                        |
|           |             | Bristle oat        | <i>Avena strigosa Schreb.</i>        | Panache    | 36.0                           | 8.2                              | 52.9                                     |                                        |
|           | Total       |                    |                                      |            | 100.0                          | 100.0                            | 647.1                                    | 25.0                                   |
| 7         | Mix12       | Field pea          | <i>Pisum sativum L.</i>              | Livioletta | 38.0                           | 1.0                              | 7.2                                      |                                        |
|           |             | Sorghum            | <i>Sorghum bicolor L.</i>            | Mithrill   | 14.0                           | 2.6                              | 19.6                                     |                                        |
|           |             | Phacelia           | <i>Phacelia tanacetifolia Benth</i>  | Beehappy   | 7.0                            | 18.8                             | 131.0                                    |                                        |
|           |             | Linseed            | <i>Linum usitatissimum L.</i>        | Lirina     | 8.0                            | 6.5                              | 41.4                                     |                                        |
|           |             | Hungarian vetch    | <i>Vicia pannonica Cranz.</i>        | Beta       | 6.0                            | 0.7                              | 4.5                                      |                                        |
|           |             | Deeptill radish    | <i>Raphanus sativus L.</i>           | Deeptill   | 5.0                            | 1.1                              | 10.2                                     |                                        |
|           |             | Niger              | <i>Guizotia abyssinica Cass.</i>     |            | 4.0                            | 7.1                              | 51.5                                     |                                        |
|           |             | Sunflower          | <i>Helianthus annuus L.</i>          | Peredovick | 2.0                            | 0.1                              | 1.2                                      |                                        |
|           |             | False flax         | <i>Camelina sativa L.</i>            | Ligena     | 2.0                            | 8.5                              | 54.7                                     |                                        |
|           |             | Persian clover     | <i>Trifolium resupinatum L.</i>      | Maral      | 4.0                            | 15.1                             | 92.7                                     |                                        |
|           |             | Alsike clover      | <i>Trifolium hybridum L.</i>         | Aurora     | 5.0                            | 29.5                             | 224.4                                    |                                        |
|           |             | Crimson clover     | <i>Trifolium incarnatum L.</i>       | Linkarus   | 5.0                            | 9.0                              | 50.3                                     |                                        |
|           | Total       |                    |                                      |            | 100.0                          | 100.0                            | 688.7                                    | 35.0                                   |

Table S2: Fertilization rates of catch crops and maize during the monitoring period 2018/19.

| Crop       | Application date | Fertilizer name      | Elements | Amount (element base; kg ha <sup>-1</sup> ) |
|------------|------------------|----------------------|----------|---------------------------------------------|
| Catch crop | 28 August 2018   | UAN28                | N        | 47                                          |
| Maize      | 19 Mart 2019     | Granukal S           | Mg/S     | 15/40                                       |
|            | 24 April 2019    | Diammonium Phosphate | N/P      | 22/55                                       |
|            | 02 Mai 2019      | Kornkali             | K/Mg/S   | 100/15/13                                   |
|            | 10 Mai 2019      | UAN28 with S         | N/S      | 80/17                                       |

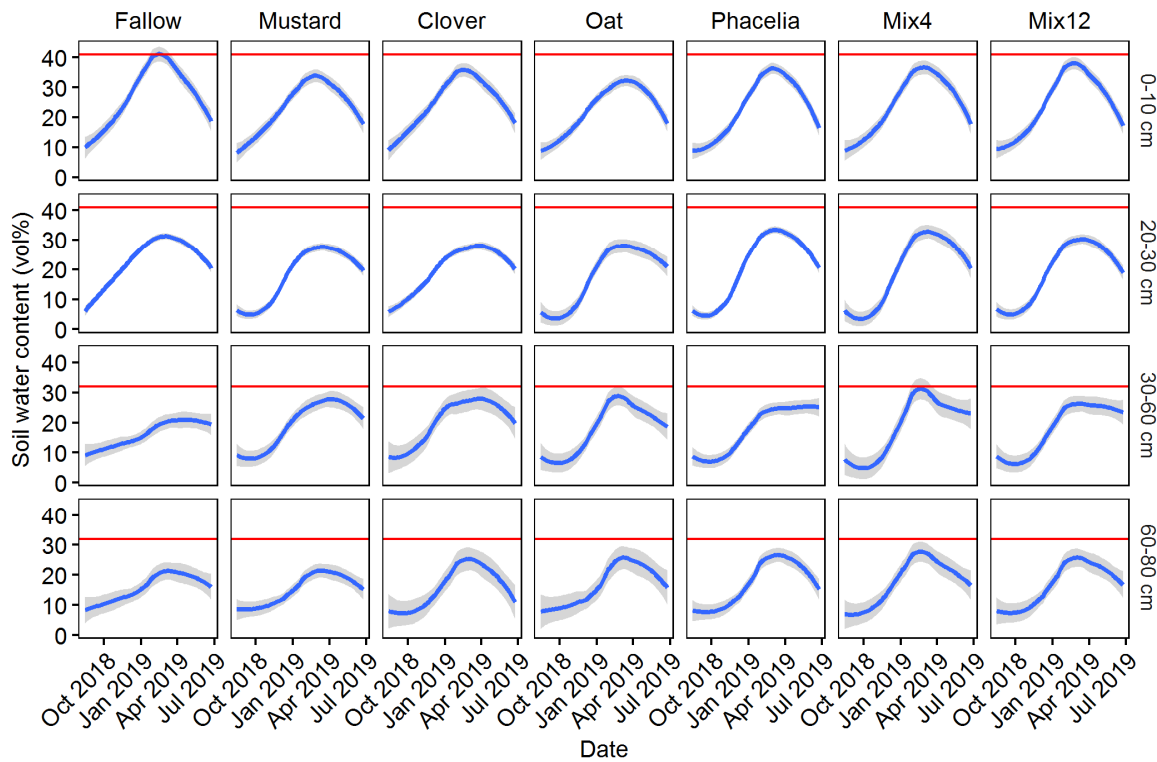

Fig. S3: Volumetric soil water content in different depth increments (vol%) throughout the observation period. The red horizontal line mark the field capacity (vol%) and the grey shade around the line displays confidence intervals.

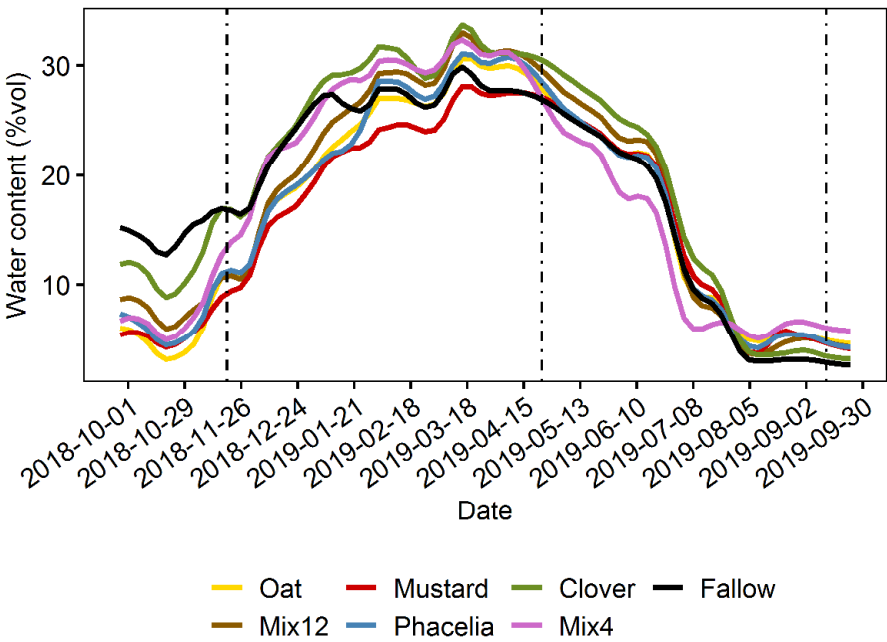

Fig. S4: Volumetric water content summarized from countinuouse data logging for one year in the upper 0-30 cm soil. Lines represent means of 2 to 3 replicates (except Mix4) and was smothed with a local polynomic regression model (loess span = 0.5). Vertical dashed lines mark different management events from left to the right: CC termination, maize seeding, and maize harvest. Data and R code are provided as supplement.

Table S3: Differences in total water content ( $L\ m^{-2}$ ; summarized to 80 cm depth) between CC treatments. Pairwise comparison from Fig. 5 at the individual sampling dates. R codes and data are provided in Supplement 2. Small letter denote the contribution to statistic different groups.

| Catch crop | 15<br>Aug<br>2018 | 09<br>Nov<br>2018 | 05<br>Dec<br>2018 | 19<br>Dec<br>2018 | 10<br>Jan<br>2019 | 31<br>Jan<br>2019 | 06<br>Mar<br>2019 | 11<br>Apr<br>2019 | 24<br>Jun<br>2019 |
|------------|-------------------|-------------------|-------------------|-------------------|-------------------|-------------------|-------------------|-------------------|-------------------|
| Fallow     | a                 | c                 | b                 | ab                | a                 | ac                | b                 | a                 | ab                |
| Mustard    | a                 | a                 | a                 | a                 | a                 | a                 | ab                | ab                | ab                |
| Clover     | a                 | bc                | b                 | b                 | ab                | abc               | ab                | ab                | ab                |
| Oat        | a                 | ab                | ac                | a                 | a                 | abc               | ab                | a                 | a                 |
| Phacelia   | a                 | a                 | ac                | ab                | a                 | abc               | a                 | b                 | b                 |
| Mix4       | a                 | a                 | ac                | a                 | b                 | b                 | ab                | ab                | ab                |
| Mix12      | a                 | a                 | c                 | a                 | ab                | bc                | ab                | b                 | ab                |

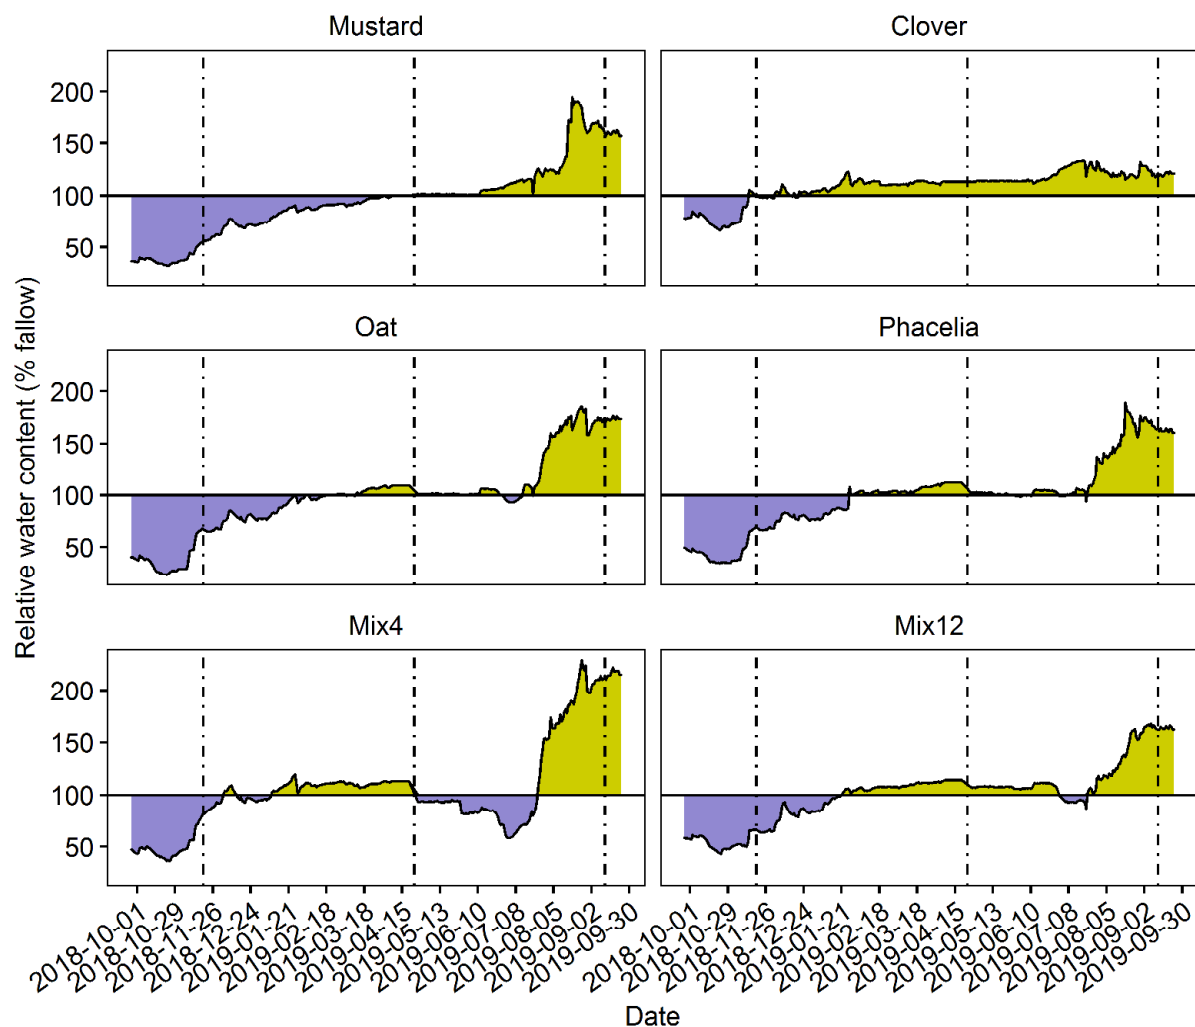

Fig. S5: Time course of soil water content from data loggers in the upper soil (0-30 cm) during the observation period. Values are presented relative to the fallow level (100%) with green areas for above fallow levels and blue ones for below fallow levels. Lines are mean values of 2 to 3 replicates. For Mix4 only one logger provided continuous results. In total we lost 6 loggers by wild animal damage. Vertical dashed lines marks different management events from left to the right: CC termination, maize seeding, and maize harvest. Data and R code are provided as supplement.

**Table S4. C:N ratios of individual plant parts from different CC species. Data derived from a greenhouse experiment in 2018. Mean values of six to eight measurements and standard error (SE) are shown.**

| Plant           | Leaf |     | Stalk |      | Root |     |
|-----------------|------|-----|-------|------|------|-----|
|                 | Mean | SE  | Mean  | SE   | Mean | SE  |
| False flax      | 8.0  | 0.9 | 30.8  | 7.4  | 37.9 | 6.7 |
| Egyptian clover | 9.9  | 0.2 | 14.8  | 0.6  | 16.8 | 0.5 |
| Linseed         | 8.6  | 0.7 | 19.1  | 2.4  | 29.3 | 3.7 |
| White mustard   | 10.5 | 0.4 | 33.6  | 2.5  | 48.3 | 2.9 |
| Bristle oat     | 15.2 | 0.4 | 34.0  | 1.5  | 3    | 1.0 |
|                 |      |     |       |      | +9.8 |     |
| Field pea       | 14.2 | 0.5 | 34.2  | 0.5  | 26.2 | 2.8 |
| Phacelia        | 8.8  | 0.3 | 19.7  | 1.8  | 27.7 | 2.0 |
| Deeptill radish | 10.5 | 1.1 | n.a.  | n.a. | 18.6 | 2.2 |
| Niger           | 8.7  | 0.2 | 11.9  | 0.2  | 34.7 | 0.1 |
| Sorghum         | 18.8 | 2.1 | 38.1  | 7.8  | 55.6 | 3.4 |
| Sunflower       | 12.7 | 0.1 | 78.9  | 0.3  | 48.0 | 0.0 |
| Hungarian vetch | 9.4  | 0.3 | 16.8  | 1.5  | 17.3 | 1.2 |

45

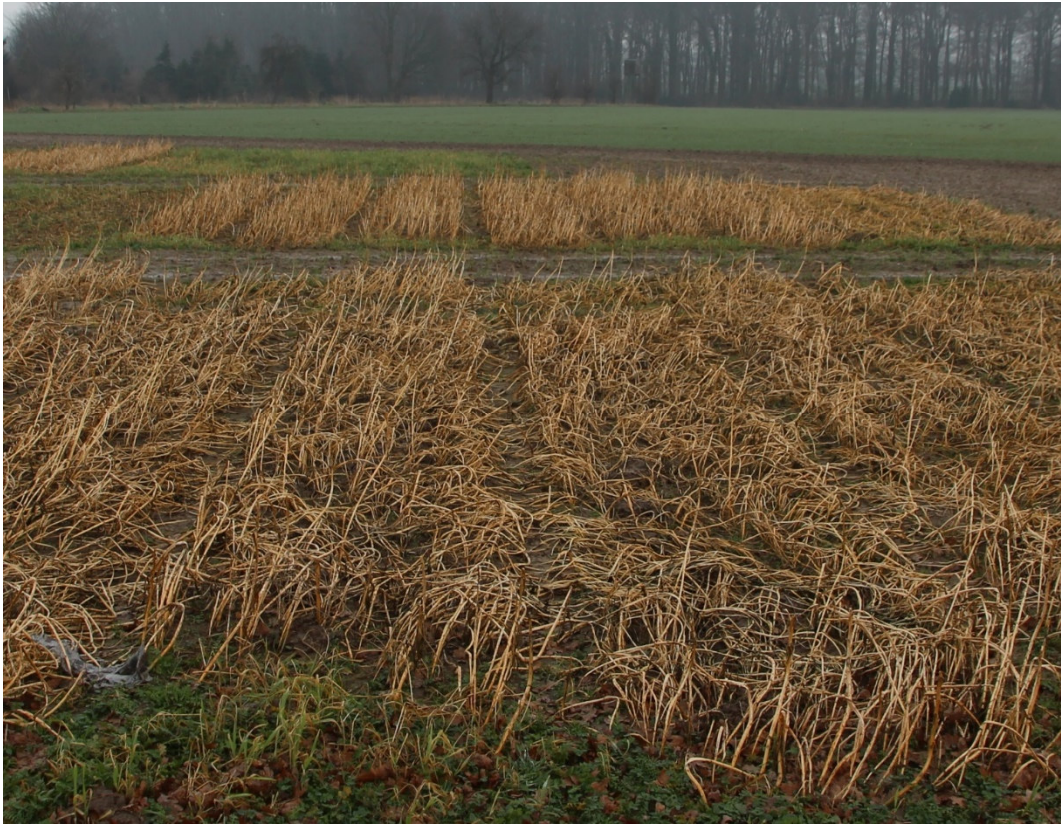

**Fig. S5: Mustard shoot residues after the winter (March 2019).**



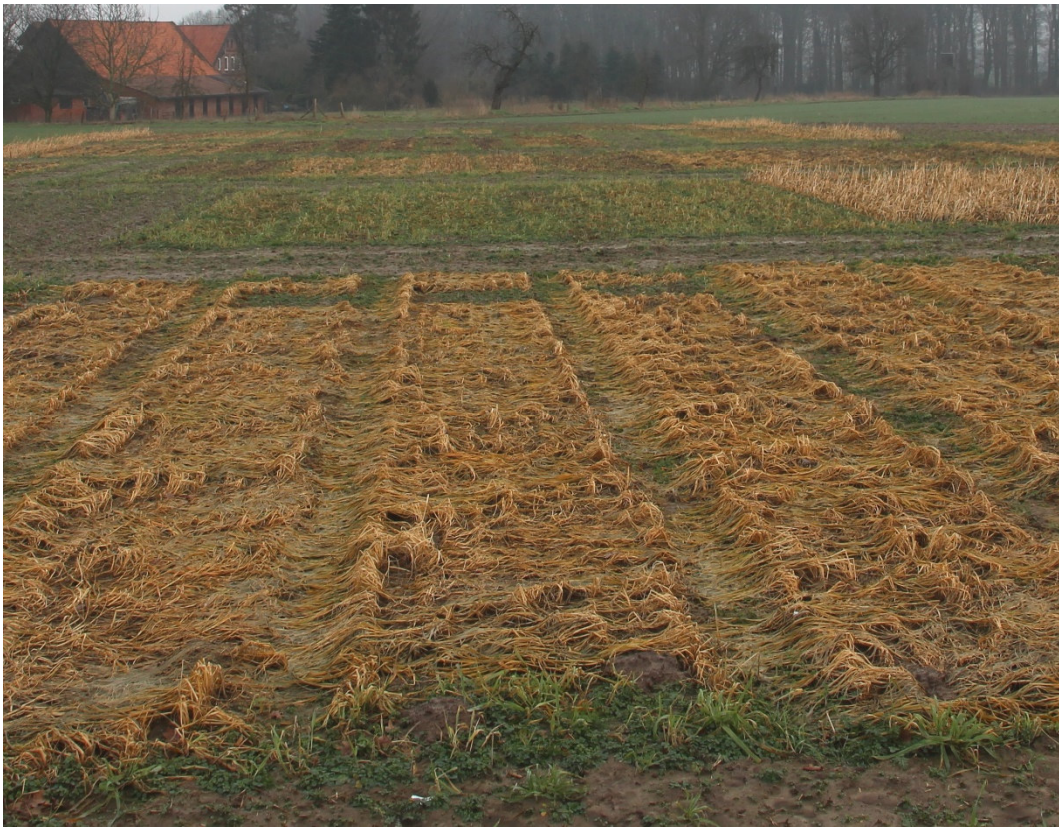

**Fig. S6. Oat residues after the winter (March 2019)**
