# Supplementary material for: Soil nitrogen and water management by winter-killed catch crops
Source: Copernicus journal article supplement (doi:10.5194/soil-2021-124), 2021-11-16
Supplement: Supplementary file [file soil-2021-124-AC2-supplement.pdf]

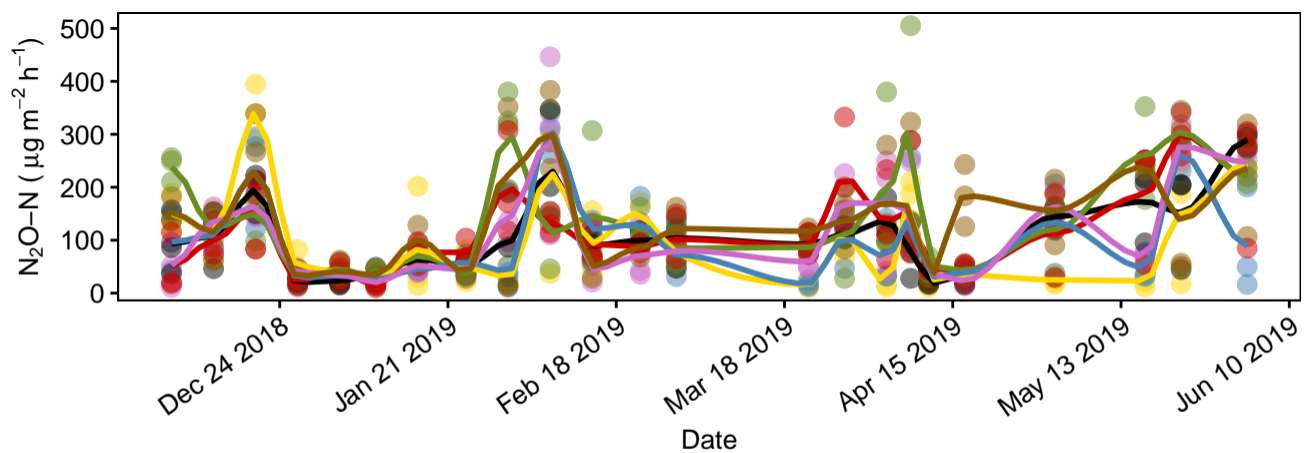

● Fallow ● Clover ● Phacelia ● Mix12  
● Mustard ● Oat ● Mix4
